# Signaling from Smo to Ci/Gli: conservation and divergence of Hedgehog pathways from *Drosophila* to vertebrates

Danwei Huangfu and Kathryn V. Anderson\*

Although the framework of the Hedgehog (Hh) signaling pathway is evolutionarily conserved, recent studies indicate that fundamental differences exist between *Drosophila* and vertebrates in the way signals are transduced from the membrane protein Smoothed (Smo) to the Ci/Gli transcription factors. For example, Smo structure and the roles of *fused* and *Suppressor of fused* have diverged. Recently, many vertebrate-specific components have been identified that act between Smo and Gli. These include intraflagellar transport proteins, which link vertebrate Hh signaling to cilia. Because abnormal Hh signaling can cause birth defects and cancer, these vertebrate-specific components may have roles in human health.

## Introduction

Genetic studies of the signaling pathways that regulate development have led to the view that a few evolutionarily conserved signaling pathways – the bone morphogenetic protein (Bmp), Wnt, receptor tyrosine kinase, Notch and Hedgehog (Hh) pathways – are used repeatedly in different contexts to control many cell fate decisions in all animals. Although cellular context controls the final output of a signaling pathway, most experiments suggest that the core components of each pathway – ligand, receptor, cytoplasmic signal transduction machinery and transcription factor – have been conserved in evolution. The Hh pathway, first elucidated by genetic studies in *Drosophila*, has been considered to be such a conserved cassette. However, recent genetic studies have defined a surprisingly large number of proteins required for Hh signaling in vertebrates that have no apparent role in *Drosophila* Hh signaling.

Loss of activity of the Hh pathway can cause a variety of human birth defects, including holoprosencephaly, polydactyly, craniofacial defects and skeletal malformations (McMahon et al., 2003). Inappropriate activation of Hh signaling is responsible for nearly all basal cell carcinomas, some medulloblastomas and rhabdomyosarcomas, and has been implicated in other tumors (Pasca di Magliano and Hebrok, 2003). In addition, recent findings about the relationship between primary cilia and the mouse Hh pathway (Huangfu et al., 2003) suggest that Hh signaling may be affected in human syndromes caused by defects in cilia, including Bardet Biedl syndrome, Kartagener syndrome, polycystic kidney disease and retinal degeneration (Pan et al., 2005).

Because of these roles of Hh signaling in human biology, it is important to understand both the similarities and differences in the Hh signal transduction pathways in *Drosophila*, the zebrafish and the mouse. Here, we focus on the comparison of the *Drosophila* and vertebrate cytoplasmic signal transduction pathways from Smo to the Ci/Gli transcription factors, the step affected by most of the newly identified, vertebrate-specific components. We describe the

evolutionarily conserved core of the cytoplasmic signal transduction pathway, the cases in which the core components of the pathway have changed structure or function in evolution, and explore the functions of the vertebrate-specific components of the pathway. We point out those cases where the observed differences between the fly and vertebrate pathways reflect genuine changes in mechanism and those that may reflect an incomplete understanding of both the fly and vertebrate pathways.

## The conserved scaffold of the Hh signaling pathway

The Hh family of secreted proteins regulates many developmental processes in both vertebrates and invertebrates (McMahon et al., 2003). The *hh* gene was first identified in *Drosophila* because of its role in embryonic segment polarity (Nüsslein-Volhard and Wieschaus, 1980) and was later shown to act in other aspects of *Drosophila* development, such as patterning of the imaginal discs (Basler and Struhl, 1994; Mohler, 1988; Tabata et al., 1992). Soon after the molecular identification of the *Drosophila hh* gene, which showed that it encodes an unusual secreted protein (Lee et al., 1992; Mohler and Vani, 1992; Tabata et al., 1992; Tashiro et al., 1993), vertebrate homologs of Hh were identified in chick and mouse, and were implicated in patterning of the limb and the neural tube (Echelard et al., 1993; Riddle et al., 1993; Roelink et al., 1994).

Hh signaling has been studied in greatest depth in *Drosophila*, where forward genetic screens have identified the components of the Hh signaling pathway and revealed its unconventional nature (Hooper and Scott, 2005). *Drosophila* has a single Hh ligand, which binds to its receptor, the multiple membrane-spanning protein Patched (Ptc). Unlike most receptors, Ptc activity turns off the downstream signaling pathway in the absence of ligand, and binding of Hh relieves that repression. Smoothed (Smo), another transmembrane protein, acts downstream of Ptc and is an essential positive mediator of the Hh signal. Active Smo regulates the bifunctional transcription factor Cubitus interruptus (Ci). Full-length Ci protein can be modified in response to Hh to become a transcriptional activator. In the absence of Hh ligand, Ci is proteolytically processed into a shorter form (Ci<sup>R</sup>) that acts as a transcriptional repressor of target genes. Both the proteolytic processing and the nuclear translocation of Ci are tightly regulated processes that involve a protein complex containing the atypical kinesin protein Costal 2 (Cos2; Cos – FlyBase), the serine threonine kinase Fused (Fu) and the novel protein Suppressor of fused [Sufu; Su(fu) – FlyBase].

The genetics of vertebrate homologs of *Drosophila* Hh pathway genes has been studied by gene targeting in the mouse and by forward genetic screens and morpholino knockdown in the zebrafish. These studies show that the scaffold of the Hh pathway is largely conserved in vertebrates: Hh negatively regulates Ptc, which negatively regulates Smo; Smo controls both activation of Gli transcription factors and proteolytic processing events that

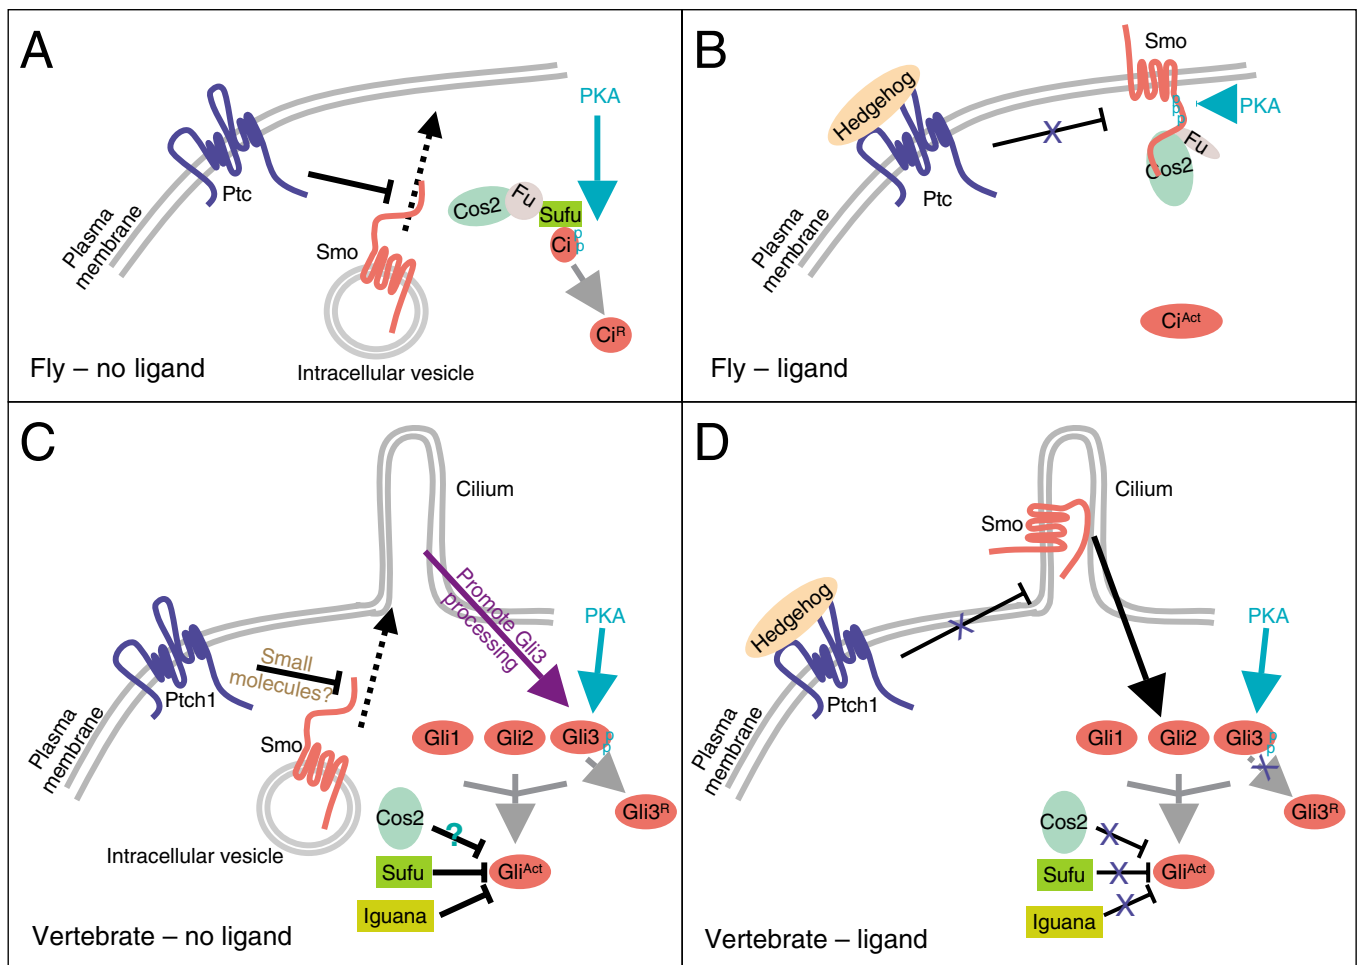

**Fig. 1. The Hedgehog pathway in *Drosophila* and vertebrates.** The Hedgehog (Hh) pathway in *Drosophila* (A,B) and in vertebrates (C,D) in the absence (A,C) or presence (B,D) of the Hh ligand. (A) In the absence of Hh, Ptc prevents the cell-surface localization of Smo, and Ci forms a complex with Cos2, Fu and Sufu, which targets Ci for proteolytic processing into the repressor form (Ci<sup>R</sup>). (B) In the presence of high levels of Hh ligand, Ptc inhibition is relieved; Smo accumulates at the plasma membrane and forms a complex with Cos2 and Fu through its C-terminal tail; Ci is activated. (C) In the absence of Hh, Ptc1 prevents the accumulation of Smo in cilia, possibly through the action of a small molecule. Gli3 is processed into a repressor form (Gli3<sup>R</sup>) in a cilia-dependent manner. The activation of all Gli proteins is inhibited by Sufu, Iguana (for zebrafish) and probably Cos2. (D) In the presence of high levels of Hh ligand, Ptc1 inhibition is relieved; Smo is targeted to cilia and activates Gli proteins in a cilia-dependent manner. Gli3 processing is also inhibited. p, phosphorylation; PKA, protein kinase A.

generate the Gli repressor (Fig. 1). The obvious difference between the *Drosophila* and fish/mouse pathways is that genes encoding specific pathway components have been duplicated in vertebrates. In the mouse, there are three Hh homologs, sonic hedgehog (*Shh*), Indian hedgehog (*Ihh*) and desert hedgehog (*Dhh*); *Shh* and *Ihh* play important roles in embryonic development, and *Dhh* regulates spermatogenesis (Bitgood et al., 1996; Chiang et al., 1996; St-Jacques et al., 1999; Zhang et al., 2001). There are five Hh homologs in zebrafish (<http://zfin.org>), and three of them [*sonic hedgehog* (*shh*), *echidna hedgehog* (*ehh*) and *tiggywinkle hedgehog* (*twhh*)] play important roles in embryonic patterning (Currie and Ingham, 1996; Ekker et al., 1995). Both mice and zebrafish have two *Ptc* homologs: *Ptc1* appears to be the major receptor during embryonic development (Goodrich et al., 1997; Wolff et al., 2003), and zebrafish *ptc2* mutants have a relatively mild phenotype (Koudijs et al., 2005). Downstream of Ptc1, a single Smo protein mediates all vertebrate signaling (Zhang et al., 2001) by regulating the three homologs of Ci, Gli1, Gli2 and Gli3 (Bai et al., 2004; Motoyama et al., 2003). Gli1 and Gli2 act

primarily as activators, while Gli3 acts both as an activator and repressor, like Ci.

### The tasks of the Hh signaling pathway

Hh signals have different effects in different contexts. Hh can act as an on/off switch that regulates the fate of immediately adjacent cells, as in the ventral ectoderm of the *Drosophila* embryo (Ingham and Hidalgo, 1993). Alternatively, Hh can act as a short-range morphogen (over 10–15 cell diameters, ~20 μm) that controls three alternative fates as a function of its concentration, as in the *Drosophila* wing imaginal disc (Strigini and Cohen, 1997). Hh can also act as a long-range morphogen that controls several cell fates, as in the vertebrate neural tube, a field that spans many cell diameters over ~200 μm. Components of the signaling pathway can be used differently in these distinct contexts. For example, *Drosophila* Fused is required for Hh signaling in some cell types but not in others; it is required in the wing disc, where Hh acts as a morphogen, but not in dorsal embryonic ectoderm, where Hh acts as a switch (Therond et al., 1999).

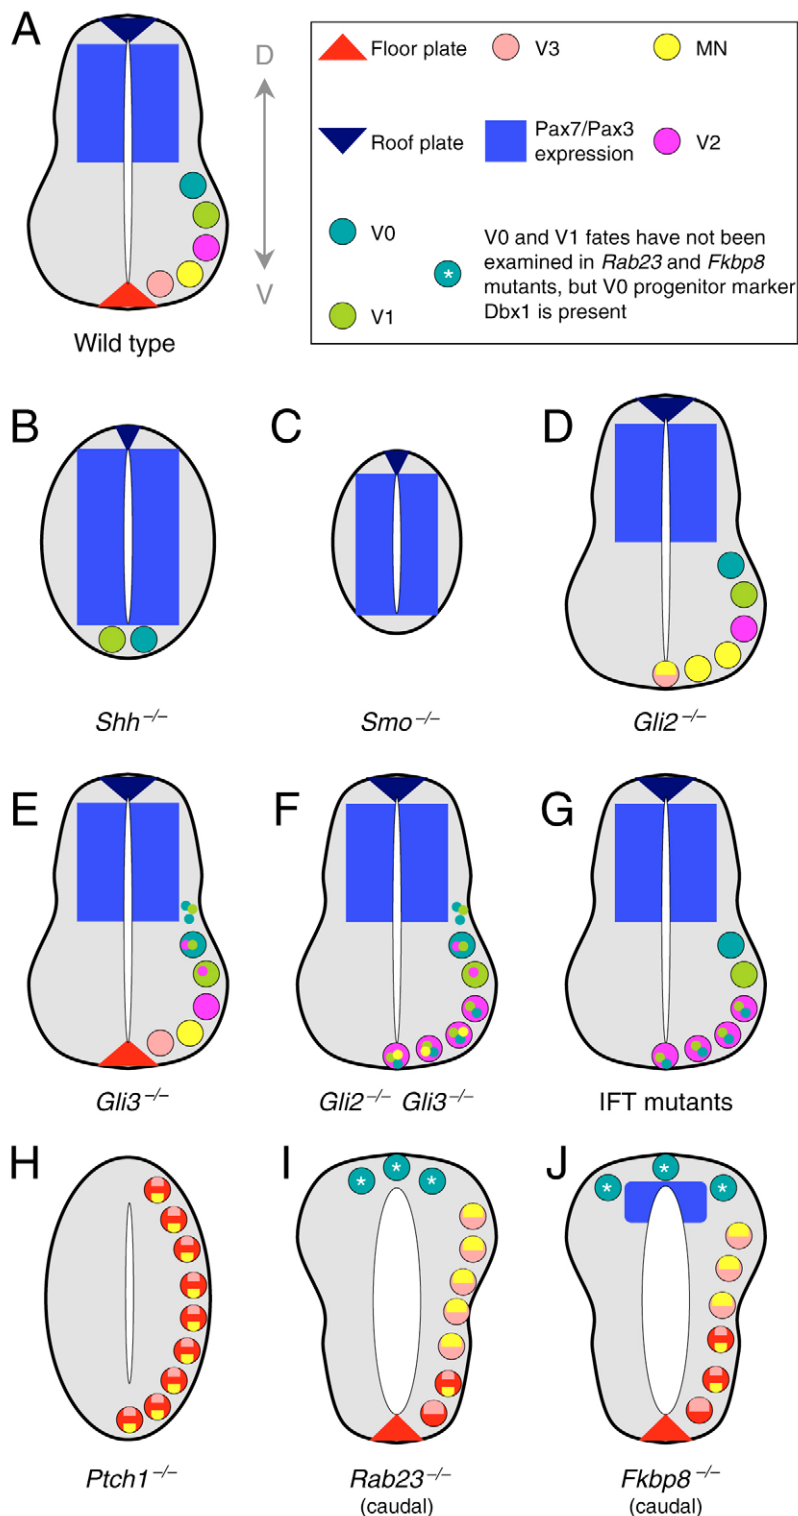

**Fig. 2. Neural tube phenotypes in mouse Hh pathway mutants.** (A) In the wild-type E10.5 embryo, roof-plate cells are specified at the dorsal (D) midline (dark blue), and dorsal neural progenitors express Pax3 and Pax7 (blue). Six ventral (V) neural cell types are specified, each marked in a different color (Jacob and Briscoe, 2003). (B) In E10.5 *Shh* mutants, ventral neural cell types are absent, V0 and V1 interneurons are present at the ventral midline, and dorsal progenitor markers are expressed throughout the neural tube (Chiang et al., 1996; Wijgerde et al., 2002). (C) *Smo* is required cell autonomously for specification of floor plate, V3, motoneurons (MNs) and V2 cells; for restriction of dorsal fates; and for the correct positioning of V1 and V0 interneurons (Wijgerde et al., 2002). (D) *Gli2* mutants lack floor-plate cells and have reduced number of V3 cells (Ding et al., 1998; Matise et al., 1998). (E) V2, V1 and V0 interneurons are expanded dorsally in *Gli3* mutants (Persson et al., 2002). (F) *Gli2/Gli3* double mutants lack both floor-plate cells and V3 interneurons (Bai et al., 2004; Lei et al., 2004; Motoyama et al., 2003). (G) IFT mutants (*Ift172*, *Polaris* and *Dnchc2*) lack floor-plate cells, V3 interneurons and nearly all MNs; V2, V1 and V0 cells are expanded ventrally (Huangfu and Anderson, 2005; Huangfu et al., 2003; Liu et al., 2005). (H) *Ptch1* mutants have a ventralized neural tube (Goodrich et al., 1997; Motoyama et al., 2003). No roof-plate or dorsal progenitor cells are specified, and ventral cell types are expanded dorsally. (I) *Rab23* mutants have a ventralized caudal neural tube (Eggenschwiler et al., 2005; Eggenschwiler et al., 2001). No roof-plate or dorsal progenitor cells are specified, and ventral cell types are expanded dorsally. (J) *Fkbp8* mutants have a ventralized caudal neural tube (Bulgakov et al., 2004). No roof-plate cells are present; ventral cell types are expanded more dorsally than in *Rab23* mutants. Unlike in *Rab23* mutant, dorsal progenitor cells are present.

A simple model for the short-range morphogen activity of Hh in the *Drosophila* wing disc has been suggested based on the bifunctional nature of the Ci transcription factor (Hooper and Scott, 2005; Méthot and Basler, 2000). In the absence of Hh,  $Ci^R$ , which is generated by proteolytic processing of full-length Ci, represses Hh target genes. Low levels of Hh block this processing of Ci, which causes derepression of some target genes, but activator Ci ( $Ci^{Act}$ ) is not made. At high Hh concentrations, Ci is fully converted to the

activator form and, with the help of Fused, moves to cell nuclei (Méthot and Basler, 2000). Accordingly, a gradient of Hh can specify at least three distinct fates.

Vertebrate Hh signaling has been studied in greatest depth in the mouse neural tube, where different concentrations of Shh appear to specify a series of cell fates (Jacob and Briscoe, 2003). The source of Shh is at the ventral pole of the neural tube, first in the notochord and then in the floor plate. Mutants that lack all Hh signaling fail to

specify correctly six distinct cell types in the ventral half of the neural tube (Wijgerde et al., 2002) (Fig. 2). As in the fly wing disc, Gli3 repressor is essential for the fates of cells that experience low concentrations of Shh (lateral neural cell types) (Persson et al., 2002) and Gli2 activator is essential for the ventral neural cells that respond to highest levels of Shh, the floor plate (Ding et al., 1998; Matise et al., 1998) (Fig. 2). The intervening neural cell types can be specified by different levels of Gli activator (Stamatiki et al., 2005), which suggests that different levels of Shh are directly translated into different ratios of Gli activator/Gli repressor, which control cell fate. However, the specification of multiple neural cell types in response to different amounts of Shh over a large field could place constraints on this signaling pathway that would require new components or strategies.

### Smo: the nodal point of the pathway

The single *Smo* gene in *Drosophila*, mouse and zebrafish is responsible for all responses to Hh ligands (Alcedo et al., 1996; van den Heuvel and Ingham, 1996; Varga et al., 2001; Zhang et al., 2001). Because different ligand concentrations can cause different cellular responses, Smo must be able to relay different levels of activity. Thus, both its regulation and function are complex.

Smo is an integral membrane protein with a seven-transmembrane (TM) domain structure like that of G-protein-coupled receptors (GPCRs) (Alcedo et al., 1996; van den Heuvel and Ingham, 1996). However, only limited evidence indicates that Smo directly couples with G proteins (DeCamp et al., 2000; Kasai et al., 2004) and it is unclear whether there is a ligand that regulates Smo activity. Sequence comparisons among vertebrate and invertebrate Smo proteins show that the TM region of Smo is relatively conserved

across species, while significant divergence exists in the cytoplasmic C-terminal tails (Fig. 3). This divergence is the first clue that Smo may act differently in vertebrates and invertebrates.

### Divergence in Smo structure

The seven-TM domain structure of Smo strongly resembles that of the Frizzled (Fz) family of proteins, the receptors of the Wnt signaling pathway, which shares several features with the Hh pathway (Nusse, 2003). Both Smo and Fz have an N-terminal extracellular cysteine-rich domain (CRD), which, in Fz, is required for binding to Wnt family ligands (Bhanot et al., 1996). Its function in Smo is unknown. Smo does not bind to Wnt family ligands, nor does it bind to the Hh ligand directly. Instead, Hh regulates Smo indirectly through the Hh receptor Ptc, which apparently does not directly interact with Smo (see below). Mutations in the *Drosophila* CRD disrupt Smo activity in vivo (Alcedo et al., 2000; Nakano et al., 2004), while deletion of the CRD in mammalian cells does not affect the activity of overexpressed Smo (Murone et al., 1999; Taipale et al., 2002). These differences could be due to divergence of the pathway, but more likely reflect activation by endogenous signals versus overexpression. Nevertheless, while the CRDs in fish and mouse Smo are 70% identical and 82% similar, the CRD in fly Smo is more divergent (43% identical, 56% similar between fly and mouse), which could mean that the vertebrate and *Drosophila* CRDs have distinct functions (Fig. 3).

The heptahelical TM region of Smo is relatively conserved (45% identity) across species. In the fly wing disc, expression of a Fz/Smo chimeric protein, in which the cytoplasmic domain of Fz was replaced with that of Smo, could mediate both low and high Hh responses in response to Wg, instead of Hh (Hooper, 2003). This indicates that the binding of Wg changes the conformation, or multimerization, of the receptor sufficiently to regulate the activity of Smo, and that similar changes occur during the normal activation of both Fz and Smo.

The Fz/Smo chimera experiments indicated that the cytoplasmic domain of *Drosophila* Smo is sufficient to mediate all responses to Hh, when properly regulated. Additional experiments in the fly have confirmed that the cytoplasmic C-terminal domain (CTD) is essential for Smo activity: expression of a membrane-tethered version of the Smo C-terminal tail alone can partially activate Hh signaling (Jia et al., 2003; Nakano et al., 2004).

Despite its important function, the CTD is the most divergent region of the protein: only the 180 amino acid juxtamembrane region is highly related in vertebrate and invertebrate Smo (Fig. 3). The 400 amino acids of the *Drosophila* protein that lie more C-terminally have only short patches of homology with either the zebrafish or the mouse Smo, whereas the entire CTD is relatively conserved (31% identity) between zebrafish and mouse Smo.

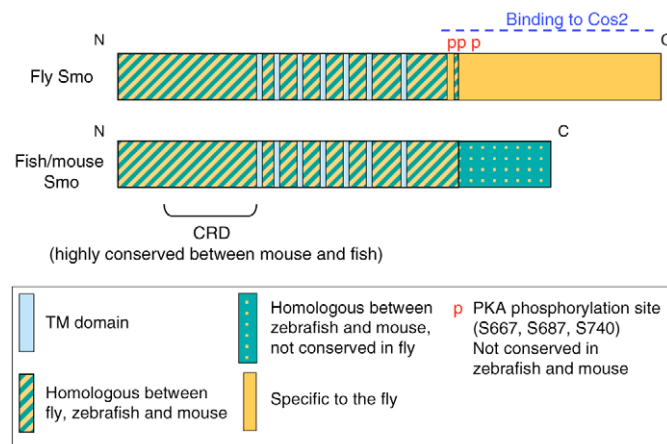

**Fig. 3. Alignment of the fly Smo protein with the zebrafish/mouse Smo.** The transmembrane (TM) domain and the N-terminal regions of the protein are relatively conserved from fly to mammals. The cysteine-rich domains (CRDs) in fish and mouse smoothed (Smo) are very similar (70% identical, 82% similar), while the CRD in fly Smo is more divergent (43% identical, 56% similar between fly and mouse). C-terminal to the 180 residues adjacent to the 7th TM domain of *Drosophila* Smo, there are only short patches of homology between *Drosophila* Smo and either the zebrafish or the mouse Smo, whereas this region is relatively conserved (31% identity) between zebrafish and mouse Smo. This same region in flies is important for binding to Cos2, indicating that the interaction between Smo and Cos2 is not conserved in vertebrates. The protein kinase A phosphorylation sites in the fly Smo protein are not conserved. PKA, protein kinase A.

### Is Smo activated by different mechanisms in flies and vertebrates?

In the absence of the Hh ligand, Ptc inhibits Smo activity. Upon binding of the ligand, Ptc relieves its inhibition of Smo and allows Smo to activate downstream components. This relationship is evolutionarily conserved; in both vertebrates and invertebrates, biochemical data show that mammalian Ptch1 binds to the Shh ligand (Marigo et al., 1996; Stone et al., 1996) and genetic analyses show Smo acts downstream of Ptc (Alcedo et al., 1996; Chen and Struhl, 1996; Zhang et al., 2001). It is, however, not clear how Ptc regulates Smo in any organism. There is little evidence that the endogenous Ptc and Smo proteins interact directly. In fact, activation of the Hh pathway induces opposite changes in the subcellular

localization of Ptc and Smo (Denef et al., 2000; Incardona et al., 2002), and Ptc inhibits Smo activity in a catalytic manner, whereby one molecule of Ptc can regulate ~50 Smo molecules (Taipale et al., 2002), contrary to the prediction of a stoichiometric interaction model.

If Ptc does not regulate Smo activity through direct interactions, there must be intermediate components that relay signals from Ptc to Smo. Some clues suggest that the intermediate component could be a small molecule. The Ptc protein has similar structure to the RND (resistance, nodulation, division) family of bacterial proton gradient driven transmembrane molecular transporters (Hooper and Scott, 1989; Nakano et al., 1989) and to the Niemann-Pick C1 (Npc1) protein, a regulator of cholesterol trafficking (Scott and Ioannou, 2004). Ptc, like Npc1, also has a sterol-sensing domain (Carstea et al., 1997), which suggests that sterols might regulate Ptc activity. These structural features suggest that Ptc may transport hydrophobic molecules that, in turn, regulate Smo activity. The finding that several exogenous small molecules that bind Smo act as either agonists and antagonists of Smo activity (Chen et al., 2002) is consistent with the possibility that an endogenous small molecule regulates Smo.

However, similar effects of these small molecules have not been seen in *Drosophila*. Cyclopamine, for example, inhibits Hh signaling in both zebrafish and mammals through direct interactions with the heptahelical region of Smo, but it has no effect in *Drosophila*, nor does it bind to the *Drosophila* Smo protein (Chen et al., 2002; Chen et al., 2001; Taipale et al., 2000). Although it is possible that subtle changes in the conformation of the *Drosophila* Smo protein render it inaccessible to cyclopamine, it is also possible that the difference in activity of small molecules represents the divergence in the regulation of Smo by upstream components of the pathway.

### Correlation of activation and localization of Smo

Cell-surface accumulation of Smo protein correlates with the activation of the Hh pathway in *Drosophila* in vivo (Denef et al., 2000; Nakano et al., 2004; Zhu et al., 2003). In addition, overexpressed membrane-tethered forms of Smo are more potent activators of the pathway in the wing disc than is wild-type Smo, while Smo mutant forms that are trapped in the endoplasmic reticulum (ER) have weaker activities. These results suggest that Hh signaling may regulate the activity of *Drosophila* Smo through regulation of its subcellular localization.

By contrast, transfected Smo in mammalian cultured cells is internalized after activation of the pathway, instead of accumulating at the cell surface (Incardona et al., 2002). Similarly, the internalization of Smo has been observed when the pathway is activated using a Hh agonist, and can be reversed by treatment with the Hh antagonist cyclopamine (Chen et al., 2004). These findings suggested that Smo localization might be regulated differently in flies and mammals. However, recent findings on the role of cilia in the Hh pathway suggest that vertebrate Smo, like the *Drosophila* protein, is recruited to specialized membranes in response to ligand (see below).

### Smo C-terminal tail phosphorylation plays different roles in *Drosophila* and vertebrates

The *Drosophila* Smo protein has a large C-terminal tail that contains a set of sites for phosphorylation by protein kinase A (PKA) and casein kinase I (CKI) (Fig. 3). Smo phosphorylation is coupled with Hh activation in *Drosophila* (Denef et al., 2000; Zhang et al., 2004). Using phosphorylation-mimicking or unphosphorylatable forms of

Smo, it was found that Smo phosphorylation is required for both its cell-surface accumulation and its activity in cell culture and in vivo (Jia et al., 2004; Zhang et al., 2004; Apionishev et al., 2005). In vitro kinase assays show that both PKA and CKI kinases can phosphorylate Smo directly, and modulation of PKA or CKI activities in vivo changes Hh-induced Smo cell-surface accumulation (Jia et al., 2004).

Most of the phosphorylated residues identified in the fly Smo C-terminal tail are not conserved in vertebrates, which argues that vertebrate Smo proteins are regulated differently. Mammalian cell culture experiments show that the mammalian Smo protein is also phosphorylated, and that the phosphorylation depends on a different kinase, the G-protein-coupled receptor kinase 2 (Grk2) (Chen et al., 2004). Phosphorylation by Grk2 causes internalization of Smo, a process that involves  $\beta$ -arrestin 2 (Arrb2).

In the zebrafish, *arrb2* morpholino knockdown experiments indicate that *arrb2* acts as a positive regulator of the Hh pathway (Wilbanks et al., 2004), which suggests that Smo phosphorylation and internalization promotes its activity. This contrasts with the case in *Drosophila*, where Smo phosphorylation also activates Smo but leads to cell surface accumulation. Mouse mutants that lack *Arrb2* are viable, but mutants that lack both *Arrb1* and *Arrb2* are embryonic lethal (Kohout et al., 2001), although the double-mutant embryos have not been examined for defects in Hh signaling. Mouse mutants that lack *Grk2* die between embryonic day (E) 9.0 and E15.5 with heart abnormalities (Jaber et al., 1996), but similarly have not been examined for Hh mutant phenotypes.

### Downstream of Smo: cytoplasmic Hh signal transducers

Analysis of the protein complexes that associate with *Drosophila* Smo has led to an understanding of the signal transduction mechanism and has provided information about how different concentrations of Hh ligand can mediate different responses. However, recent studies show that some of these downstream events may not be conserved in vertebrates.

### Cos2 bridges Smo and Ci in *Drosophila*

Cos2 is a kinesin-related protein that regulates the production of both  $Ci^R$  and  $Ci^{Act}$  (Sisson et al., 1997; Wang, G. et al., 2000; Wang and Holmgren, 2000). Overexpression of the CTD of Smo activates low levels of Hh signaling in the wing disc. This phenotype is suppressed by expression of an additional copy of wild-type Cos2, which suggests that the CTD of Smo antagonizes Cos2 activity (Hooper, 2003).

This idea was supported by evidence showing that direct physical interactions occur between *Drosophila* Smo and Cos2 (Jia et al., 2003; Lum et al., 2003b; Ogden et al., 2003; Ruel et al., 2003). In the absence of Hh signaling, Cos2 forms a complex with Fu, Sufu and the Ci transcription factor that both promotes cleavage of the full-length Ci to  $Ci^R$  and keeps full-length Ci out of the nucleus. In response to low levels of Hh, the Smo-Cos2 complex is recruited to the membrane, and this relieves the inhibitory effect of Cos2 on Ci, which may lead to dissociation of Ci from the Smo-Cos2 complex (Ruel et al., 2003). However, Ci is not fully activated and cannot enter the nucleus, because Ci is tethered by Sufu in a complex that also includes Cos2. At high levels of Hh signaling, this final restriction is removed, and  $Ci^{Act}$  can move into the nucleus to activate the pathway to a high level.

The identification of homologs of *Cos2* was challenging because of the large number of kinesin-related genes in vertebrate genomes. Two mammalian *Cos2*-like proteins, Kif7 and Kif27, both share

considerable sequence homology with *Drosophila* *Cos2* (22-23% identical, 37-38% similar) (Kato and Kato, 2004). Morpholino knockdown experiments have indicated that a zebrafish homolog of mammalian *Kif7* acts like *Cos2* as a negative regulator of the Hh pathway (Tay et al., 2005). The major *Cos2* interaction domain of *Smo* is in the long C-terminal tail present in the fly protein that is not conserved in zebrafish (Jia et al., 2003). A more membrane-proximal segment that interacts with *Cos2* has limited sequence conservation in the vertebrate *Smo* protein (Lum et al., 2003b), although it has not been tested whether this domain can bind *Kif7*. The roles of *Kif7* and *Kif27* in the mammalian Hh pathway have not yet been tested.

### The role of Fused

In *Drosophila*, the response to high levels of Hh specifically requires the serine/threonine kinase Fused (Preat et al., 1990). Recently, a zebrafish homolog of *fused* (*stk36*) was identified, and morpholino knockdown experiments indicate that zebrafish *fused* is required for responses to high levels of Hh (Wolff et al., 2003). Morpholino knockdown of both *fused* and *Sufu* restored the specification of muscle cell types that depend on high levels of Hh signaling, which suggests that zebrafish Fused antagonizes *Sufu*, similar to the role of Fused in the fly pathway (Wolff et al., 2003). However fish Fused also appears to play a role in the response to submaximal, as well as high, Hh signaling, unlike the *Drosophila* protein (Wolff et al., 2003).

The mouse Fused homolog (*Stk36*) is broadly expressed in the developing embryo, including in Hh-responsive tissues (Chen et al., 2005). However mice that lack all activity of this protein survive beyond birth and have no apparent defects in hedgehog signaling (Chen et al., 2005; Merchant et al., 2005). This striking discrepancy between the mouse and the zebrafish/fly functions of this protein could be explained if another distantly related kinase overlaps in function with mouse Fused homolog. Alternatively, the function of Fused may have diverged between fish and mice.

### Sufu: a major repressor of the vertebrate pathway

*Drosophila Sufu* was identified through its ability to suppress the phenotype of *fused*. *Sufu* helps to tether full-length *Ci* in the cytoplasm, and therefore helps keep the pathway switched off in the absence of ligand (Méthot and Basler, 2000). *Sufu* also appears to play a role in the inhibition of  $Ci^{Act}$  in the nucleus (Kogerman et al., 1999; Pearse et al., 1999; Wang et al., 1999). *Sufu*-null mutant flies are viable and fertile, and show a phenotype only when *fused*, or another pathway component, is also mutated (Preat, 1992). Thus, *Drosophila Sufu* has a minor role in negative regulation of the *Drosophila* Hh pathway.

The zebrafish *dreumes* gene was recently shown to encode *Sufu*. Although the *dreumes* mutant does not show any obvious Hh-related phenotypes (Koudijs et al., 2005), morpholino knockdown of *sufu* in zebrafish causes a gain of Hh signaling phenotype in muscle patterning (Wolff et al., 2003). The stronger effect of the morpholino knockdown is probably due to a maternal *Sufu* contribution that is not inactivated in homozygous *dreumes* mutants (Koudijs et al., 2005). The *sufu* morpholinos produced an effect on muscle patterning even when wild-type *fused* was present, which suggests that *Sufu* has a different, and more crucial, role in negative regulation of the vertebrate pathway than in *Drosophila*.

A targeted allele of mouse *Sufu* has a more dramatic effect on Hh signaling. Null embryos die at midgestation and show a strong Hh gain-of-function ventralization of cell types in the neural tube (Cooper et al., 2005). Like patched 1 (*Ptch1*) null mutants, all

cells in the neural plate of *Sufu* embryos express markers of the most ventral neural cell type, the floor plate, and express *Ptch1*

*1*, a direct Hh target gene. It is possible that the stronger phenotype of the mouse *Sufu* null than the zebrafish morphant is due to residual *Sufu* function in the fish that is resistant to morpholino knockdown.

Both the zebrafish and mouse results demonstrate that vertebrate *Sufu* plays a crucial role in negative regulation of the pathway, in contrast to its subtle role in *Drosophila*. In keeping with these findings, humans that are heterozygous for *SUFU* mutations have a predisposition to medulloblastoma, as seen with mutations in *PTCH1* (Pasca di Magliano and Hebrok, 2003; Taylor et al., 2002). It remains to be determined which aspect of *Sufu* function is crucial in vertebrates – regulation of *Gli* nuclear localization, regulation of *Gli*-activator activity or some other role in the pathway.

### PKA is a conserved negative modulator of the pathway

In *Drosophila*, PKA is required for the proteolytic cleavage of *Ci* to generate  $Ci^R$  (Chen et al., 1999; Chen et al., 1998; Price and Kalderon, 1999; Wang et al., 1999). The phosphorylation of specific *Ci* residues by PKA primes the phosphorylation of additional sites by CK1 and GSK3 $\beta$  that are also necessary for processing (Price and Kalderon, 1999); fully phosphorylated *Ci* can be recognized by *Slimb*, a component of the SCF ubiquitin ligase that allows proteasome-dependent processing of *Ci*. In both *PKA* and *Slimb* mutant clones, full-length *Ci* accumulates owing to lack of proteolytic cleavage; however, *Ci* becomes a transcriptional activator only in *PKA*, but not in *Slimb*, mutant clones because PKA is also required to prevent activation of the full-length *Ci* protein (Wang et al., 1999). In support of this idea, loss of PKA phosphorylation sites not only blocks the proteolytic cleavage of *Ci*, but also makes it constitutively active (Chen et al., 1999; Price and Kalderon, 1999).

In addition to its repressor function, PKA has also been proposed to act as an activator of the *Drosophila* Hh pathway. Unphosphorylatable forms of *Ci* can be further activated by PKA overexpression (Chen et al., 1998), which suggests PKA may phosphorylate other factors that regulate *Ci* activity. As described above, PKA directly phosphorylates *Smo*, and overexpression of the unphosphorylatable form of *Smo* does not rescue the *Smo* mutant phenotype, which suggests that the activator role of PKA is due to its ability to phosphorylate *Smo*.

No genetic analysis has been carried out in vertebrates to assess the *in vivo* functions of *Btrc* ( $\beta$ -TrCP;  $\beta$ -transducin repeat-containing protein, the *Slimb* homolog), CK1 and GSK3 $\beta$ , in part because of the existence of more than one homologous gene. However, PKA has been shown to function as a repressor, but not as an activator, of the zebrafish and mouse Hh pathways. Dominant-negative and constitutively active forms of PKA expressed in zebrafish embryos indicate that PKA is a cell-autonomous negative regulator of Hh signaling in the fish (Concordet et al., 1996; Hammerschmidt et al., 1996). Two mouse genes encode the PKA catalytic subunits  $C\alpha$  and  $C\beta$  (*Prkaca* and *Prkacb*). Although both  $C\alpha$  and  $C\beta$  single mutants develop normally,  $C\alpha$  homozygous mutants that have only a single copy of wild-type  $C\beta$ , or  $C\beta$  homozygous mutants with only a single copy of wild type  $C\alpha$ , survive to E12.5, and show dorsal expansion of ventral markers in the neural tube, consistent with a role for PKA as a negative regulator of Hh signaling (Huang et al., 2002). As the PKA phosphorylation sites are not conserved in vertebrate *Smo* proteins (Fig. 3), it is unlikely that PKA activates the vertebrate pathway by phosphorylating *Smo*.

### Smo and downstream proteins may require localization to cilia for activity

Intraflagellar transport (IFT) is a process that is required for the assembly and maintenance of all cilia and flagella in plants, protists and animals (Rosenbaum and Witman, 2002). Seventeen IFT proteins have been identified that comprise two large complexes (A and B) that transport cargo along the axonemal microtubules of the cilia. We and others have found that several components of the mouse IFT machinery, including three IFT complex B proteins (Ift172/Wimple, Polaris/Ift88/Ttc10, Ngd5/Ift52), an IFT anterograde motor subunit (Kif3a) and an IFT retrograde motor subunit (Dnchc2) are all required for Hh signaling at a step between Smo and the Gli transcription factors (Huangfu and Anderson, 2005; Huangfu et al., 2003; Liu et al., 2005). The neural tubes of these IFT mutants lack most ventral neural cell types, but lateral and dorsal neural cell types are specified normally, a phenotype similar to that of mutants that lack both *Gli2* and *Gli3* (Bai et al., 2004; Lei et al., 2004; Motoyama et al., 2003) (Fig. 2). *Ift172* mutants also do not form a lung (D.H. and K.V.A., unpublished), like *Gli2 Gli3* double mutants (Motoyama et al., 1998) and unlike *Shh* mutants (Litington et al., 1998), which suggests that IFT is required for both Shh and Ihh signaling. Mouse IFT proteins are required for all modulation of both Gli activator and Gli repressor in response to Hh ligands (Huangfu and Anderson, 2005; Liu et al., 2005); as a result, IFT mutants display a loss of Hh signaling phenotype in the neural tube, where Gli activators play the major role in pattern formation, and a gain of Hh signaling phenotype in the limb, where Gli3 repressor plays the major role.

Although *Drosophila* has IFT proteins, fly mutants that lack the homologs of *Ift88*, *Ift172* and *Kif3a* are viable and do not have the patterning defects expected in Hh pathway mutants (Avidor-Reiss et al., 2004; Han et al., 2003; Ray et al., 1999). Instead, these mutants have defects in sensory behavior; this correlates well with the requirement for these proteins to make cilia in ciliated sensory neurons.

The function of the IFT components in mammals has some parallels with that of *Drosophila* Cos2. Both have dual positive and negative functions in the pathway, as both are required for Ci/Gli3 processing and both are required for Ci/Gli activator functions. Cos2 is a kinesin-like protein and IFTs are microtubule associated, although the Kif3a kinesin-subunit of the anterograde IFT motor is not the ortholog of Cos2 (Katoh and Katoh, 2004). Because of the similar functions of Cos2 and IFT proteins, one possibility is that IFT proteins substitute for the function of Cos2 in mammals and provide the missing link between Smo and the Gli proteins.

Alternatively, several lines of evidence suggest that IFT components have a different function from Cos2 and are required because of the role of cilia in the Hh pathway. Both the IFT anterograde and retrograde motors are required for both Gli activator functions and formation of Gli3 repressor (Huangfu and Anderson, 2005), which is consistent with a requirement for normally structured cilia in transduction of the signal from Smo to Gli proteins rather than vectorial transport of pathway components. In addition, the presence of cilia is correlated with Hh responsiveness. Non-motile primary cilia are present on most vertebrate cells, including every Hh-responsive cell type that has been examined (Pazour and Witman, 2003). Cultured cells become Hh responsive only when they are confluent (Bailey et al., 2002), and also have cilia only when they are confluent (Quarmany and Parker, 2005).

Recent data have shown that mouse Smo becomes localized to cilia in response to Hh signaling (Corbit et al., 2005). Smo is approximately threefold enriched in the cilia relative to other parts

of the cell in the mouse node, where Hh signaling is active. When Smo was expressed in MDCK cells, it was not localized to cilia unless the pathway was activated by treatment with Shh. Expression of an activated allele of Smo in these cells led to its constitutive localization to cilia, even in the absence of Hh. This signal-dependent localization is reminiscent of the situation in *Drosophila*, where Smo activity correlates with its cell-surface localization, although Hh-responsive cells in *Drosophila* do not have cilia. The localization of Smo to cilia depends on a short motif immediately C-terminal to the last TM domain that is present in other 7-TM receptors that localize to cilia. This motif is required for localization of mouse Smo to cilia, and appears to be required for Smo activity (Corbit et al., 2005). The same motif is present in *Drosophila* Smo; if that motif is required for membrane localization of fly Smo, it will be interesting to explore how *Drosophila* has retained this targeting mechanism even in the absence of cilia.

As IFT proteins are required for both Gli3 processing and Gli activation (Huangfu and Anderson, 2005; Liu et al., 2005), both positively and negatively acting components of the pathway may be localized to cilia. It will be of particular interest to learn whether mammalian Gli, Sufu and Fu are also localized to cilia. If these proteins are enriched in cilia, it would suggest that cilia act as signaling centers where pathway components can be concentrated and their interactions enhanced. It will also be of interest to determine whether IFT-mediated transport is required for pathway components to interact correctly.

There are currently no data indicating that IFT proteins are required for Hh signaling in zebrafish, but several pieces of data are missing in the IFT puzzle. At this point, there are two possibilities: IFT proteins may have been substituted for Cos2 in the pathway at some point after the divergence of fish and mammals; or fish and mammals may use both Cos2 and IFT proteins in parallel processes downstream of Smo. The morpholino data indicate that Cos2 is an important negative regulator in zebrafish, while there are no data about Cos2 function in mammals. Nor is it known whether IFT proteins are required for Hh signaling in the zebrafish. There are zebrafish mutations in several IFT components, but these mutants or morpholino knockdown experiments have not shown Hh-related phenotypes (Sun et al., 2004; Tsujikawa and Malicki, 2004). However, zygotic null mutants of IFT components still have cilia, because of maternally contributed components (Sun et al., 2004), so it is possible that IFT proteins play a role in zebrafish Hh signaling. Although data to resolve these issues should become available soon, the similarity of the fish and mammalian Smo proteins (and their differences from *Drosophila* Smo) suggests to us that vertebrates will use both Cos2 and IFT proteins in Hh signal transduction.

### Additional cytoplasmic components of the vertebrate pathway

Genetic screens and targeted mutations have identified several other genes that appear to act downstream of Smo and upstream of Gli proteins in the vertebrate Hh pathway, based on loss-of-function phenotypes that resemble those of other Hh pathway mutants and on genetic and physical interactions with known pathway components. These mutants have diverse phenotypes (Fig. 2) and may have distinct effects on Gli proteins (Fig. 4), suggesting that there are additional fundamental differences between the mechanisms that transduce Hh signals in *Drosophila* and vertebrates.

A new component of the zebrafish pathway, *iguana* (*igu; dzip1* – Zebrafish Information Network), has both positive and negative effects on the pathway (Sekimizu et al., 2004; Wolff et al., 2004). Igu acts downstream of PKA, interacts genetically with Sufu and

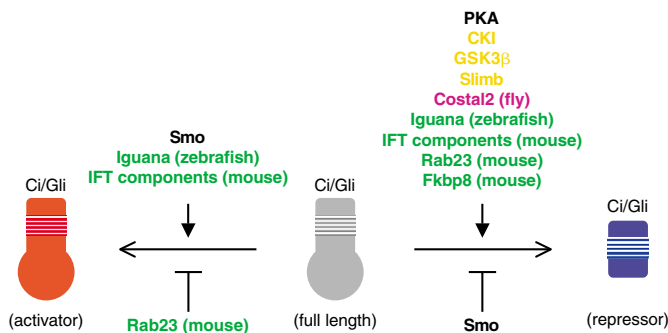

**Fig. 4. The regulation of Ci/Gli proteins.** The full-length Ci protein (gray) can be proteolytically cleaved to generate a repressor form (blue) or activated to generate an activator form (red). The vertebrate Gli homologs share similar domain structures with Ci, but only Gli3 is known to be cleaved into a functional repressor form. The conserved and diverged aspects of the regulation of Ci/Gli activation and cleavage are shown. The zinc-finger domains are indicated by stripes. Components that have been shown either to promote or to prevent these processes are indicated in the figure. Components shown in black are common to both vertebrates and invertebrates; those in yellow are likely to be conserved, but there is insufficient *in vivo* data to support their conserved roles; those in purple can play a role in invertebrates; and those in green function in mouse and zebrafish, but not in fly. CKI, casein kinase 1; GSK3 $\beta$ , glycogen synthase kinase 3 $\beta$ ; PKA, protein kinase A.

appears to control the nuclear localization of Gli proteins. *igu* has homologs of unknown function in both *Drosophila* and mammals. Human *DZIP1*, the homolog of *igu*, was initially identified in a yeast two-hybrid screen as a protein that interacts with DAZ, a protein involved in spermatogenesis (Moore et al., 2003); however, the functions of *DZIP1* in spermatogenesis and Hh signaling have not been determined.

Several other mouse genes have been identified that act in the cytoplasmic signaling pathway, including *Sil*, *Rab23*/open brain and *Fkbp8*. Mutations in all these genes cause striking effects on neural patterning, but the phenotypes are distinct (Fig. 2).

*Rab23* (previously *opb*) mutants show a gain of Hh signaling phenotype in the caudal spinal cord and other cell types (Eggenchwiler and Anderson, 2000; Eggenchwiler et al., 2001). *Rab23* belongs to the Rab family of GTPases that regulate vesicular transport. Although overexpressed *Rab23* colocalizes with Ptch1 in endosomes (Evans et al., 2003), double mutant analysis indicates that *Rab23* acts downstream of both Ptch1 and Smo (Eggenchwiler et al., 2005). Loss of Gli2 almost completely suppresses the *Rab23* phenotype (Eggenchwiler et al., 2005), which argues that the *Rab23* acts primarily as a negative regulator of Gli2 activity. There is a *Drosophila* ortholog of *Rab23*, but mutants in this gene are viable and fertile (J. Sierra and I. Guerro, personal communication).

Both *Ift172* and *Polaris/Ift88* are required for the activity of *Rab23* (Huangfu et al., 2003). If we assume that the IFT proteins are required because of their role in cilia, then *Rab23* could regulate a trafficking event downstream of Smo that requires cilia or *Rab23* could regulate trafficking inside cilia.

*Fkbp8* is a member of the FK506-binding protein family (the immunophilins) that acts as an antagonist of Hh signaling in the caudal neural tube (Bulgakov et al., 2004) and also acts downstream of Smo and upstream of Gli proteins (Eggenchwiler et al., 2005). The ventralized phenotype of *Fkbp8* mutants is distinct from that of *Rab23* mutants: there is a greater expansion of the most ventral neural

cell type, the floor plate, but dorsal cell types are less affected (Fig. 2). *Fkbp8* has been shown to inhibit the Ca<sup>2+</sup>-calmodulin activated serine/threonine-specific protein phosphatase calcineurin (Shirane and Nakayama, 2003), although it is not known whether the function of *Fkbp8* in the Hh pathway depends on calcineurin. There are three calcineurin catalytic subunit genes, and mutants that lack any single subunit do not have Hh-related phenotypes (Schulz and Yutzey, 2004), which could be due to overlapping functions. Unlike *Rab23*, the effect of *Fkbp8* appears to be neural specific; this is the first clear example of a tissue-specific regulator of the pathway in vertebrates.

*Sil* was identified as a gene at a chromosome breakpoint associated with human leukemia (Aplan et al., 1990), although *Sil* is not the oncogene of the translocation. Targeted deletion of *Sil* causes embryonic lethality at ~E9.0, associated with a loss of ventral neural cell types, such as *Smo* or *Kif3a* mutants (Izraeli et al., 1999). Genetic experiments demonstrated that *Sil* is required downstream of Ptch1 to turn on Hh targets (Izraeli et al., 2001). The *Sil* protein does not have any obvious structural domain that indicates its function, and there is no obvious *Drosophila* homolog.

At least one newly defined component may play roles in both the mammalian and *Drosophila* pathways. A targeted mouse mutation in a gene encoding an Ig-family transmembrane protein, *Cdon*, causes microform holoprosencephaly, a condition associated with loss of Hh signaling (Cole and Krauss, 2003). The *Drosophila* homolog of this gene, *iHog*, was identified in an RNAi screen to be a positive regulator of Hh signaling (Lum et al., 2003a), which is consistent with the mouse mutant phenotype.

For each of the newly identified components, future experiments will test their function in the pathway. Even if *Drosophila* homologs of the new vertebrate genes do not have dramatic phenotypes on their own, they might, like *Sufu*, still modulate the fly pathway in the appropriate double mutant background. The analysis of mouse double mutants that lack both the newly identified players and core pathway components should define the step affected by each new vertebrate gene. The subcellular localization of the proteins in embryonic tissues will also be of central importance. For example, it will be important to learn if any of these proteins are localized to cilia. Bardet-Biedl syndrome (BBS) is a complex human genetic disorder associated with polycystic kidney, polydactyly, situs reversal and obesity (Pan et al., 2005). Both polydactyly and situs reversal are associated with abnormal Hh signaling, which suggests that there could be connections between abnormal Hh signaling, BBS and basal bodies. Some BBS proteins are localized to basal bodies, the centriole-based structure at the base of the cilia, and some BBS proteins undergo IFT (Blacque et al., 2004; Kim et al., 2004; Kim et al., 2005), so some of the newly identified Hh pathway components could act in basal bodies.

Are these new genes just the tip of the iceberg? Given that the genetic screens that identified *Rab23* and the IFT mutants have not yet been carried to saturation (García-García et al., 2005; Kasarskis et al., 1998), it is certain that more components remain to be identified that act between Smo and Gli. For example, the chicken *talpid* mutants have phenotypes similar to those of IFT mutants (Buxton et al., 2004; Caruccio et al., 1999; Lewis et al., 1999; Wang, B. et al., 2000), and could well encode additional proteins that act at this step.

Several hundred proteins are required for normal cilia structure and function (Avidor-Reiss et al., 2004; Li et al., 2004), and if normally structured cilia are essential for mammalian Hh signaling, many of those proteins might impact on Hh signal transduction. If this proves to be the case, the challenge will be to understand the physical relations among the ciliary and Hh pathway components that allow efficient Hh signaling.



## The Ci/Gli transcription factors

The separation of activator and repressor function into different vertebrate Gli proteins provides the opportunity for additional modulation of the pathway. In *Drosophila*, the bifunctional protein Ci is the only transcription factor at the end of the Hh pathway, while there are three Gli proteins in the mouse that have different biochemical properties and different modes of regulation. Gli3 is bifunctional, like Ci: it can be processed into a repressor form in vivo and also functions as a transcriptional activator (Wang, B. et al., 2000). Gli1 cannot be proteolytically processed and is only a transcriptional activator (Dai et al., 1999; Lee et al., 1997; Ruiz i Altaba, 1998). Gli2 is an important activator in vivo, and because Gli1 can replace Gli2 function in vivo, it is likely that Gli2 does not have a significant repressor function (Aza-Blanc et al., 2000; Wang, B. et al., 2000).

The three Gli proteins and Ci share high homology in the zinc-finger domain, but have limited homology outside this region (Matisse and Joyner, 1999), which raises the possibility that other proteins may interact with and modulate the activity of individual Gli proteins. Several vertebrate proteins that modulate Gli activity have been identified, but their specificities are not yet clear. MIM/BEG4, a transcriptional target of mammalian Hh signaling, can associate with Gli1 and Gli2 and potentiate transcriptional activity, at least in vitro (Callahan et al., 2004; Gonzalez-Quevedo et al., 2005). The Ski co-repressor can bind Gli3 and regulate its repressive activity (Dai et al., 2002). The mouse Zic proteins function in dorsal neural patterning and can interact with Gli proteins to modulate their transcriptional activity, but no specificity of interaction was observed in vitro (Aruga, 2004; Koyabu et al., 2001). Specific interactions with other transcription factors or co-factors might help explain how the single morphogen Shh can specify so many different ventral neural cell types (Fig. 2).

## Conclusion: evolution and the Hh pathway

Despite the evolutionarily conserved core of the pathway, the data reviewed here highlight, surprisingly, many differences between the *Drosophila* and vertebrate Hh signal transduction pathways. Differences are apparent in the structure of the Smo protein, especially its CTD, in the activity of small molecule agonists and antagonists of Smo, in the subcellular localization of active Smo, in the requirement for IFT and other proteins in the vertebrate but not the *Drosophila* pathway, and in the functions of Fused and Sufu. Although these differences are real, and the identification of vertebrate-specific pathway components has important implications for the human diseases that involve Hh signaling and cilia, additional experiments are required to determine whether the biochemical mechanisms of signal transduction differ fundamentally between *Drosophila* and vertebrates.

Comparisons of the pathway between species should help to define the true core pathway. Did mammals add cilia to the pathway or did *Drosophila* lose the requirement for them? The ancestral roles of Cos2, Fused and Sufu also need to be investigated. More detailed comparisons between the zebrafish and mouse pathways is a first step towards answering these questions. RNAi strategies should also help to define the essential components of the pathway in non-model organisms in order to deduce the structure of the ancestral Hh signaling pathway.

## Note added in proof

Recently, Haycraft et al. demonstrated that Gli1, Gli2, Gli3 and Sufu proteins are enriched in cilia (Haycraft et al., 2005).

We thank Jeremy Reiter and Jonathan Eggenschwiler for sharing information prior to publication. Our research is supported by the NIH.

## References

- Alcedo, J., Ayzenzon, M., Von Ohlen, T., Noll, M. and Hooper, J. E. (1996). The *Drosophila smoothened* gene encodes a seven-pass membrane protein, a putative receptor for the hedgehog signal. *Cell* **86**, 221-232.
- Alcedo, J., Zou, Y. and Noll, M. (2000). Posttranscriptional regulation of smoothened is part of a self-correcting mechanism in the Hedgehog signaling system. *Mol. Cell* **6**, 457-465.
- Apionishev, S., Katanayeva, N. M., Marks, S. A., Kalderon, D. and Tomlinson, A. (2005). *Drosophila* Smoothened phosphorylation sites essential for Hedgehog signal transduction. *Nat. Cell Biol.* **7**, 86-92.
- Aplan, P. D., Lombardi, D. P., Ginsberg, A. M., Cossman, J., Bertness, V. L. and Kirsch, I. R. (1990). Disruption of the human SCL locus by "illegitimate" V-(D)-J recombinase activity. *Science* **250**, 1426-1429.
- Aruga, J. (2004). The role of Zic genes in neural development. *Mol. Cell. Neurosci.* **26**, 205-221.
- Avidor-Reiss, T., Maer, A. M., Koundakjian, E., Polyanovsky, A., Keil, T., Subramaniam, S. and Zuker, C. S. (2004). Decoding cilia function; defining specialized genes required for compartmentalized cilia biogenesis. *Cell* **117**, 527-539.
- Aza-Blanc, P., Lin, H. Y., Ruiz i Altaba, A. and Kornberg, T. B. (2000). Expression of the vertebrate Gli proteins in *Drosophila* reveals a distribution of activator and repressor activities. *Development* **127**, 4293-4301.
- Bai, C. B., Stephen, D. and Joyner, A. L. (2004). All mouse ventral spinal cord patterning by hedgehog is Gli dependent and involves an activator function of Gli3. *Dev. Cell* **6**, 103-115.
- Bailey, E. C., Milenkovic, L., Scott, M. P., Collawn, J. F. and Johnson, R. L. (2002). Several *PATCHED1* missense mutations display activity in *patched1*-deficient fibroblasts. *J. Biol. Chem.* **277**, 33632-33640.
- Basler, K. and Struhl, G. (1994). Compartment boundaries and the control of *Drosophila* limb pattern by hedgehog protein. *Nature* **368**, 208-214.
- Bhanot, P., Brink, M., Samos, C. H., Hsieh, J. C., Wang, Y., Macke, J. P., Andrew, D., Nathans, J. and Nusse, R. (1996). A new member of the frizzled family from *Drosophila* functions as a Wingless receptor. *Nature* **382**, 225-230.
- Bitgood, M. J., Shen, L. and McMahon, A. P. (1996). Sertoli cell signaling by Desert hedgehog regulates the male germline. *Curr. Biol.* **6**, 298-304.
- Blacque, O. E., Reardon, M. J., Li, C., McCarthy, J., Mahjoub, M. R., Ansley, S. J., Badano, J. L., Mah, A. K., Beales, P. L., Davidson, W. S. et al. (2004). Loss of *C. elegans* BBS-7 and BBS-8 protein function results in cilia defects and compromised intraflagellar transport. *Genes Dev.* **18**, 1630-1642.
- Bulgakov, O. V., Eggenschwiler, J. T., Hong, D. H., Anderson, K. V. and Li, T. (2004). FKBPF8 is a negative regulator of mouse sonic hedgehog signaling in neural tissues. *Development* **131**, 2149-2159.
- Buxton, P., Francis-West, P. H., Davey, M. G., Tickle, C., Paton, I. R., Morrice, D. R. and Burt, D. W. (2004). Craniofacial development in the *talpid3* chicken mutant. *Differentiation* **72**, 348-362.
- Callahan, C. A., Ofstad, T., Horng, L., Wang, J. K., Zhen, H. H., Coulombe, P. A. and Oro, A. E. (2004). MIM/BEG4, a Sonic hedgehog-responsive gene that potentiates Gli-dependent transcription. *Genes Dev.* **18**, 2724-2729.
- Carstea, E. D., Morris, J. A., Coleman, K. G., Loftus, S. K., Zhang, D., Cummings, C., Gu, J., Rosenfeld, M. A., Pavan, W. J., Krizman, D. B. et al. (1997). *Niemann-Pick C1* disease gene: homology to mediators of cholesterol homeostasis. *Science* **277**, 228-231.
- Caruccio, N. C., Martinez-Lopez, A., Harris, M., Dvorak, L., Bitgood, J., Simandl, B. K. and Fallon, J. F. (1999). Constitutive activation of sonic hedgehog signaling in the chicken mutant *talpid(2)*: Shh-independent outgrowth and polarizing activity. *Dev. Biol.* **212**, 137-149.
- Chen, J. K., Taipale, J., Cooper, M. K. and Beachy, P. A. (2002). Inhibition of Hedgehog signaling by direct binding of cyclopamine to Smoothed. *Genes Dev.* **16**, 2743-2748.
- Chen, M. H., Gao, N., Kawakami, T. and Chuang, P. T. (2005). Mice deficient in the fused homolog do not exhibit phenotypes indicative of perturbed hedgehog signaling during embryonic development. *Mol. Cell. Biol.* **25**, 7042-7053.
- Chen, W., Burgess, S. and Hopkins, N. (2001). Analysis of the zebrafish smoothened mutant reveals conserved and divergent functions of hedgehog activity. *Development* **128**, 2385-2396.
- Chen, W., Ren, X. R., Nelson, C. D., Barak, L. S., Chen, J. K., Beachy, P. A., de Sauvage, F. and Lefkowitz, R. J. (2004). Activity-dependent internalization of smoothened mediated by beta-arrestin 2 and GRK2. *Science* **306**, 2257-2260.
- Chen, Y. and Struhl, G. (1996). Dual roles for patched in sequestering and transducing Hedgehog. *Cell* **87**, 553-563.
- Chen, Y., Gallaher, N., Goodman, R. H. and Smolik, S. M. (1998). Protein kinase A directly regulates the activity and proteolysis of cubitus interruptus. *Proc. Natl. Acad. Sci. USA* **95**, 2349-2354.
- Chen, Y., Cardinaux, J. R., Goodman, R. H. and Smolik, S. M. (1999). Mutants of cubitus interruptus that are independent of PKA regulation are independent of hedgehog signaling. *Development* **126**, 3607-3616.
- Chiang, C., Litingtung, Y., Lee, E., Young, K. E., Corden, J. L., Westphal, H.

- and Beachy, P. A. (1996). Cyclopia and defective axial patterning in mice lacking *Sonic hedgehog* gene function. *Nature* **383**, 407-413.
- Cole, F. and Krauss, R. S. (2003). Microform holoprosencephaly in mice that lack the Ig superfamily member *Cdon*. *Curr. Biol.* **13**, 411-415.
- Concordet, J. P., Lewis, K. E., Moore, J. W., Goodrich, L. V., Johnson, R. L., Scott, M. P. and Ingham, P. W. (1996). Spatial regulation of a zebrafish patched homologue reflects the roles of sonic hedgehog and protein kinase A in neural tube and somite patterning. *Development* **122**, 2835-2846.
- Cooper, A. F., Yu, K. P., Brueckner, M., Brailey, L. L., Johnson, L., McGrath, J. M. and Bale, A. E. (2005). Cardiac and CNS defects in a mouse with targeted disruption of suppressor of fused. *Development* **132**, 4407-4417.
- Corbit, K. C., Aanstad, P., Singla, V., Norman, A. R., Stainier, D. Y. and Reiter, J. F. (2005). Vertebrate Smoothed functions at the primary cilium. *Nature* **437**, 1018-1021.
- Currie, P. D. and Ingham, P. W. (1996). Induction of a specific muscle cell type by a hedgehog-like protein in zebrafish. *Nature* **382**, 452-455.
- Dai, P., Akimaru, H., Tanaka, Y., Maekawa, T., Nakafuku, M. and Ishii, S. (1999). Sonic Hedgehog-induced activation of the *Gli1* promoter is mediated by *GLI3*. *J. Biol. Chem.* **274**, 8143-8152.
- Dai, P., Shinagawa, T., Nomura, T., Harada, J., Kaul, S. C., Wadhwa, R., Khan, M. M., Akimaru, H., Sasaki, H., Colmenares, C. et al. (2002). *Ski* is involved in transcriptional regulation by the repressor and full-length forms of *Gli3*. *Genes Dev.* **16**, 2843-2848.
- DeCamp, D. L., Thompson, T. M., de Sauvage, F. J. and Lerner, M. R. (2000). Smoothed activates Galphai-mediated signaling in frog melanophores. *J. Biol. Chem.* **275**, 26322-26327.
- Denef, N., Neubuser, D., Perez, L. and Cohen, S. M. (2000). Hedgehog induces opposite changes in turnover and subcellular localization of patched and smoothed. *Cell* **102**, 521-531.
- Ding, Q., Motoyama, J., Gasca, S., Mo, R., Sasaki, H., Rossant, J. and Hui, C. C. (1998). Diminished Sonic hedgehog signaling and lack of floor plate differentiation in *Gli2* mutant mice. *Development* **125**, 2533-2543.
- Echelard, Y., Epstein, D. J., St-Jacques, B., Shen, L., Mohler, J., McMahon, J. A. and McMahon, A. P. (1993). Sonic hedgehog, a member of a family of putative signaling molecules, is implicated in the regulation of CNS polarity. *Cell* **75**, 1417-1430.
- Eggenchwiler, J. T. and Anderson, K. V. (2000). Dorsal and lateral fates in the mouse neural tube require the cell-autonomous activity of the *open brain* gene. *Dev. Biol.* **227**, 648-660.
- Eggenchwiler, J. T., Espinoza, E. and Anderson, K. V. (2001). *Rab23* is an essential negative regulator of the mouse Sonic hedgehog signalling pathway. *Nature* **412**, 194-198.
- Eggenchwiler, J. T., Bulgakov, O. V., Li, T. and Anderson, K. V. (2005). Mouse *Rab23* regulates Hedgehog signaling from Smoothed to Gli proteins. *Dev. Biol.* (in press).
- Ekker, S. C., Ungar, A. R., Greenstein, P., von Kessler, D. P., Porter, J. A., Moon, R. T. and Beachy, P. A. (1995). Patterning activities of vertebrate hedgehog proteins in the developing eye and brain. *Curr. Biol.* **5**, 944-955.
- Evans, T. M., Ferguson, C., Wainwright, B. J., Parton, R. G. and Wicking, C. (2003). *Rab23*, a negative regulator of hedgehog signaling, localizes to the plasma membrane and the endocytic pathway. *Traffic* **4**, 869-884.
- García-García, M. J., Eggenchwiler, J. T., Caspary, T., Alcorno, H. L., Wyler, M. R., Huangfu, D., Rakehan, A. S., Lee, J. D., Feinberg, E. H., Timmer, J. R. et al. (2005). Inaugural Article: Analysis of mouse embryonic patterning and morphogenesis by forward genetics. *Proc. Natl. Acad. Sci. USA* **102**, 5913-5919.
- Gonzalez-Quevedo, R., Shoffer, M., Horng, L. and Oro, A. E. (2005). Receptor tyrosine phosphatase-dependent cytoskeletal remodeling by the hedgehog-responsive gene *MIM/BEG4*. *J. Cell Biol.* **168**, 453-463.
- Goodrich, L. V., Milenkovic, L., Higgins, K. M. and Scott, M. P. (1997). Altered neural cell fates and medulloblastoma in mouse *patched* mutants. *Science* **277**, 1109-1113.
- Hammerschmidt, M., Bitgood, M. J. and McMahon, A. P. (1996). Protein kinase A is a common negative regulator of Hedgehog signaling in the vertebrate embryo. *Genes Dev.* **10**, 647-658.
- Han, Y. G., Kwok, B. H. and Kernan, M. J. (2003). Intraflagellar transport is required in *Drosophila* to differentiate sensory cilia but not sperm. *Curr. Biol.* **13**, 1679-1686.
- Haycraft, C. J., Banizs, B., Aydin-Son, Y., Zhang, Q., Michaud, E. J. and Yoder, B. K. (2005). *Gli2* and *Gli3* localize to cilia and require the intraflagellar transport protein *Polaris* for processing and function. *PLoS Genet.* **1**, e53.
- Hooper, J. E. (2003). Smoothed translates Hedgehog levels into distinct responses. *Development* **130**, 3951-3963.
- Hooper, J. E. and Scott, M. P. (1989). The *Drosophila patched* gene encodes a putative membrane protein required for segmental patterning. *Cell* **59**, 751-765.
- Hooper, J. E. and Scott, M. P. (2005). Communicating with Hedgehogs. *Nat. Rev. Mol. Cell Biol.* **6**, 306-317.
- Huang, Y., Roelink, H. and McKnight, G. S. (2002). Protein kinase A deficiency causes axially localized neural tube defects in mice. *J. Biol. Chem.* **277**, 19889-19896.
- Huangfu, D. and Anderson, K. V. (2005). Cilia and Hedgehog responsiveness in the mouse. *Proc. Natl. Acad. Sci. USA* **102**, 11325-11330.
- Huangfu, D., Liu, A., Rakehan, A. S., Murcia, N. S., Niswander, L. and Anderson, K. V. (2003). Hedgehog signalling in the mouse requires intraflagellar transport proteins. *Nature* **426**, 83-87.
- Incardona, J. P., Gruenberg, J. and Roelink, H. (2002). Sonic hedgehog induces the segregation of patched and smoothed in endosomes. *Curr. Biol.* **12**, 983-995.
- Ingham, P. W. and Hidalgo, A. (1993). Regulation of wingless transcription in the *Drosophila* embryo. *Development* **117**, 283-291.
- Izraeli, S., Lowe, L. A., Bertness, V. L., Good, D. J., Dorward, D. W., Kirsch, I. R. and Kuehn, M. R. (1999). The *Sil* gene is required for mouse embryonic axial development and left-right specification. *Nature* **399**, 691-694.
- Izraeli, S., Lowe, L. A., Bertness, V. L., Campaner, S., Hahn, H., Kirsch, I. R. and Kuehn, M. R. (2001). Genetic evidence that *Sil* is required for the Sonic Hedgehog response pathway. *Genesis* **31**, 72-77.
- Jaber, M., Koch, W. J., Rockman, H., Smith, B., Bond, R. A., Sulik, K. K., Ross, J., Jr, Lefkowitz, R. J., Caron, M. G. and Giros, B. (1996). Essential role of beta-adrenergic receptor kinase 1 in cardiac development and function. *Proc. Natl. Acad. Sci. USA* **93**, 12974-12979.
- Jacob, J. and Briscoe, J. (2003). Gli proteins and the control of spinal-cord patterning. *EMBO Rep.* **4**, 761-765.
- Jia, J., Tong, C. and Jiang, J. (2003). Smoothed transduces Hedgehog signal by physically interacting with Costal2/Fused complex through its C-terminal tail. *Genes Dev.* **17**, 2709-2720.
- Jia, J., Tong, C., Wang, B., Luo, L. and Jiang, J. (2004). Hedgehog signalling activity of Smoothed requires phosphorylation by protein kinase A and casein kinase I. *Nature* **432**, 1045-1050.
- Kasai, K., Takahashi, M., Osumi, N., Sinnarajah, S., Takeo, T., Ikeda, H., Kehrl, J. H., Itoh, G. and Arnheiter, H. (2004). The G12 family of heterotrimeric G proteins and Rho GTPase mediate Sonic hedgehog signalling. *Genes Cells* **9**, 49-58.
- Kasarskis, A., Manova, K. and Anderson, K. V. (1998). A phenotype-based screen for embryonic lethal mutations in the mouse. *Proc. Natl. Acad. Sci. USA* **95**, 7485-7490.
- Katoh, Y. and Katoh, M. (2004). *KIF27* is one of orthologs for *Drosophila* Costal-2. *Int. J. Oncol.* **25**, 1875-1880.
- Kim, J. C., Badano, J. L., Sibold, S., Esmail, M. A., Hill, J., Hoskins, B. E., Leitch, C. C., Venner, K., Ansley, S. J., Ross, A. J. et al. (2004). The Bardet-Biedl protein *BBS4* targets cargo to the pericentriolar region and is required for microtubule anchoring and cell cycle progression. *Nat. Genet.* **36**, 462-470.
- Kim, J. C., Ou, Y. Y., Badano, J. L., Esmail, M. A., Leitch, C. C., Fiedrich, E., Beales, P. L., Archibald, J. M., Katsanis, N., Rattner, J. B. et al. (2005). *MKKS/BBS6*, a divergent chaperonin-like protein linked to the obesity disorder Bardet-Biedl syndrome, is a novel centrosomal component required for cytokinesis. *J. Cell Sci.* **118**, 1007-1020.
- Kogerman, P., Grimm, T., Kogerman, L., Krause, D., Unden, A. B., Sandstedt, B., Toftgard, R. and Zaphiropoulos, P. G. (1999). Mammalian suppressor-of-fused modulates nuclear-cytoplasmic shuttling of *Gli-1*. *Nat. Cell Biol.* **1**, 312-319.
- Kohout, T. A., Lin, F. S., Perry, S. J., Conner, D. A. and Lefkowitz, R. J. (2001).  $\beta$ -Arrestin 1 and 2 differentially regulate heptahelical receptor signaling and trafficking. *Proc. Natl. Acad. Sci. USA* **98**, 1601-1606.
- Koudijs, M. J., den Broeder, M. J., Keijsers, A., Wienholds, E., Houwing, S., van Rooijen, E. M., Geisler, R. and van Eeden, F. J. (2005). The zebrafish mutants *dre*, *uki*, and *lep* encode negative regulators of the Hedgehog signaling pathway. *PLoS Genet.* **1**, e19.
- Koyabu, Y., Nakata, K., Mizugishi, K., Aruga, J. and Mikoshiba, K. (2001). Physical and functional interactions between *Zic* and *Gli* proteins. *J. Biol. Chem.* **276**, 6889-6892.
- Lee, J., Platt, K. A., Censullo, P. and Ruiz i Altaba, A. (1997). *Gli1* is a target of Sonic hedgehog that induces ventral neural tube development. *Development* **124**, 2537-2552.
- Lee, J. J., von Kessler, D. P., Parks, S. and Beachy, P. A. (1992). Secretion and localized transcription suggest a role in positional signaling for products of the segmentation gene *hedgehog*. *Cell* **71**, 33-50.
- Lei, Q., Zelman, A. K., Kuang, E., Li, S. and Matisse, M. P. (2004). Transduction of graded Hedgehog signaling by a combination of *Gli2* and *Gli3* activator functions in the developing spinal cord. *Development* **131**, 3593-3604.
- Lewis, K. E., Drossopoulou, G., Paton, I. R., Morrice, D. R., Robertson, K. E., Burt, D. W., Ingham, P. W. and Tickle, C. (1999). Expression of *ptc* and *gli* genes in *talpid3* suggests bifurcation in *Shh* pathway. *Development* **126**, 2397-2407.
- Li, J. B., Gerdes, J. M., Haycraft, C. J., Fan, Y., Teslovich, T. M., May-Simera, H., Li, H., Blacque, O. E., Li, L., Leitch, C. C. et al. (2004). Comparative Genomics Identifies a Flagellar and Basal Body Proteome that Includes the *BBS5* Human Disease Gene. *Cell* **117**, 541-552.
- Litingtung, Y., Lei, L., Westphal, H. and Chiang, C. (1998). Sonic hedgehog is essential to foregut development. *Nat. Genet.* **20**, 58-61.
- Liu, A., Wang, B. and Niswander, L. A. (2005). Mouse intraflagellar transport

- proteins regulate both the activator and repressor functions of Gli transcription factors. *Development* **132**, 3103-3111.
- Lum, L., Yao, S., Mozer, B., Rovescalli, A., Von Kessler, D., Nirenberg, M. and Beachy, P. A.** (2003a). Identification of Hedgehog pathway components by RNAi in *Drosophila* cultured cells. *Science* **299**, 2039-2045.
- Lum, L., Zhang, C., Oh, S., Mann, R. K., von Kessler, D. P., Taipale, J., Weis-Garcia, F., Gong, R., Wang, B. and Beachy, P. A.** (2003b). Hedgehog signal transduction via Smoothed association with a cytoplasmic complex scaffolded by the atypical kinesin, Costal-2. *Mol. Cell* **12**, 1261-1274.
- Marigo, V., Davey, R. A., Zuo, Y., Cunningham, J. M. and Tabin, C. J.** (1996). Biochemical evidence that patched is the Hedgehog receptor. *Nature* **384**, 176-179.
- Matise, M. P. and Joyner, A. L.** (1999). Gli genes in development and cancer. *Oncogene* **18**, 7852-7859.
- Matise, M. P., Epstein, D. J., Park, H. L., Platt, K. A. and Joyner, A. L.** (1998). Gli2 is required for induction of floor plate and adjacent cells, but not most ventral neurons in the mouse central nervous system. *Development* **125**, 2759-2770.
- McMahon, A. P., Ingham, P. W. and Tabin, C. J.** (2003). Developmental roles and clinical significance of hedgehog signaling. *Curr. Top. Dev. Biol.* **53**, 1-114.
- Merchant, M., Evangelista, M., Luoh, S. M., Frantz, G. D., Chalasani, S., Carano, R. A., van Hoy, M., Ramirez, J., Ogasawara, A. K., McFarland, L. M. et al.** (2005). Loss of the serine/threonine kinase fused results in postnatal growth defects and lethality due to progressive hydrocephalus. *Mol. Cell. Biol.* **25**, 7054-7068.
- Méthot, N. and Basler, K.** (2000). Suppressor of fused opposes hedgehog signal transduction by impeding nuclear accumulation of the activator form of Cubitus interruptus. *Development* **127**, 4001-4010.
- Mohler, J.** (1988). Requirements for hedgehog, a segmental polarity gene, in patterning larval and adult cuticle of *Drosophila*. *Genetics* **120**, 1061-1072.
- Mohler, J. and Vani, K.** (1992). Molecular organization and embryonic expression of the hedgehog gene involved in cell-cell communication in segmental patterning of *Drosophila*. *Development* **115**, 957-971.
- Moore, F. L., Jaruzelska, J., Fox, M. S., Urano, J., Firpo, M. T., Turek, P. J., Dorfman, D. M. and Pera, R. A.** (2003). Human Pumilio-2 is expressed in embryonic stem cells and germ cells and interacts with DAZ (Deleted in AZoospermia) and DAZ-like proteins. *Proc. Natl. Acad. Sci. USA* **100**, 538-543.
- Motoyama, J., Liu, J., Mo, R., Ding, Q., Post, M. and Hui, C. C.** (1998). Essential function of Gli2 and Gli3 in the formation of lung, trachea and oesophagus. *Nat. Genet.* **20**, 54-57.
- Motoyama, J., Milenkovic, L., Iwama, M., Shikata, Y., Scott, M. P. and Hui, C. C.** (2003). Differential requirement for Gli2 and Gli3 in ventral neural cell fate specification. *Dev. Biol.* **259**, 150-161.
- Murone, M., Rosenthal, A. and de Sauvage, F. J.** (1999). Sonic hedgehog signaling by the patched-smoothened receptor complex. *Curr. Biol.* **9**, 76-84.
- Nakano, Y., Guerrero, I., Hidalgo, A., Taylor, A., Whittle, J. R. and Ingham, P. W.** (1989). A protein with several possible membrane-spanning domains encoded by the *Drosophila* segment polarity gene *patched*. *Nature* **341**, 508-513.
- Nakano, Y., Nystedt, S., Shivdasani, A. A., Strutt, H., Thomas, C. and Ingham, P. W.** (2004). Functional domains and sub-cellular distribution of the Hedgehog transducing protein Smoothened in *Drosophila*. *Mech. Dev.* **121**, 507-518.
- Nusse, R.** (2003). Wnts and Hedgehogs: lipid-modified proteins and similarities in signaling mechanisms at the cell surface. *Development* **130**, 5297-5305.
- Nüsslein-Volhard, C. and Wieschaus, E.** (1980). Mutations affecting segment number and polarity in *Drosophila*. *Nature* **287**, 795-801.
- Ogden, S. K., Ascano, M., Jr, Stegman, M. A., Suber, L. M., Hooper, J. E. and Robbins, D. J.** (2003). Identification of a functional interaction between the transmembrane protein Smoothened and the kinesin-related protein Costal2. *Curr. Biol.* **13**, 1998-2003.
- Pan, J., Wang, Q. and Snell, W. J.** (2005). Cilium-generated signaling and cilia-related disorders. *Lab. Invest.* **85**, 452-463.
- Pasca di Magliano, M. and Hebrok, M.** (2003). Hedgehog signalling in cancer formation and maintenance. *Nat. Rev. Cancer* **3**, 903-911.
- Pazour, G. J. and Witman, G. B.** (2003). The vertebrate primary cilium is a sensory organelle. *Curr. Opin. Cell Biol.* **15**, 105-110.
- Pearse, R. V., 2nd, Collier, L. S., Scott, M. P. and Tabin, C. J.** (1999). Vertebrate homologs of *Drosophila* suppressor of fused interact with the gli family of transcriptional regulators. *Dev. Biol.* **212**, 323-336.
- Persson, M., Stamatakis, D., te Welscher, P., Andersson, E., Bose, J., Ruther, U., Ericson, J. and Briscoe, J.** (2002). Dorsal-ventral patterning of the spinal cord requires Gli3 transcriptional repressor activity. *Genes Dev.* **16**, 2865-2878.
- Preat, T.** (1992). Characterization of *Suppressor of fused*, a complete suppressor of the *fused* segment polarity gene of *Drosophila melanogaster*. *Genetics* **132**, 725-736.
- Preat, T., Therond, P., Lamour-Isnard, C., Limbourg-Bouchon, B., Tricoire, H., Erk, I., Mariol, M. C. and Busson, D.** (1990). A putative serine/threonine protein kinase encoded by the segment-polarity *fused* gene of *Drosophila*. *Nature* **347**, 87-89.
- Price, M. A. and Kalderon, D.** (1999). Proteolysis of cubitus interruptus in *Drosophila* requires phosphorylation by protein kinase A. *Development* **126**, 4331-4339.
- Quarby, L. M. and Parker, J. D.** (2005). Cilia and the cell cycle? *J. Cell Biol.* **169**, 707-710.
- Ray, K., Perez, S. E., Yang, Z., Xu, J., Ritchings, B. W., Steller, H. and Goldstein, L. S.** (1999). Kinesin-II is required for axonal transport of choline acetyltransferase in *Drosophila*. *J. Cell Biol.* **147**, 507-518.
- Riddle, R. D., Johnson, R. L., Laufer, E. and Tabin, C.** (1993). Sonic hedgehog mediates the polarizing activity of the ZPA. *Cell* **75**, 1401-1416.
- Roelink, H., Augsburger, A., Heemskerk, J., Korzh, V., Norlin, S., Ruiz i Altaba, A., Tanabe, Y., Plazcek, M., Edlund, T. and Jessell, T. M.** (1994). Floor plate and motor neuron induction by vhh-1, a vertebrate homolog of hedgehog expressed by the notochord. *Cell* **76**, 761-775.
- Rosenbaum, J. L. and Witman, G. B.** (2002). Intraflagellar transport. *Nat. Rev. Mol. Cell Biol.* **3**, 813-825.
- Ruel, L., Rodriguez, R., Gallet, A., Lavenant-Staccini, L. and Therond, P. P.** (2003). Stability and association of Smoothened, Costal2 and Fused with Cubitus interruptus are regulated by Hedgehog. *Nat. Cell Biol.* **5**, 907-913.
- Ruiz i Altaba, A.** (1998). Combinatorial Gli gene function in floor plate and neuronal inductions by Sonic hedgehog. *Development* **125**, 2203-2212.
- Schulz, R. A. and Yutzey, K. E.** (2004). Calcineurin signaling and NFAT activation in cardiovascular and skeletal muscle development. *Dev. Biol.* **266**, 1-16.
- Scott, C. and Ioannou, Y. A.** (2004). The NPC1 protein: structure implies function. *Biochim. Biophys. Acta* **1685**, 8-13.
- Sekimizu, K., Nishioka, N., Sasaki, H., Takeda, H., Karlstrom, R. O. and Kawakami, A.** (2004). The zebrafish *iguana* locus encodes Dzip1, a novel zinc-finger protein required for proper regulation of Hedgehog signaling. *Development* **131**, 2521-2532.
- Shirane, M. and Nakayama, K. I.** (2003). Inherent calcineurin inhibitor FKBP38 targets Bcl-2 to mitochondria and inhibits apoptosis. *Nat. Cell Biol.* **5**, 28-37.
- Sisson, J. C., Ho, K. S., Suyama, K. and Scott, M. P.** (1997). Costal2, a novel kinesin-related protein in the Hedgehog signaling pathway. *Cell* **90**, 235-245.
- Stamatakis, D., Ulloa, F., Tsoni, S. V., Mynett, A. and Briscoe, J.** (2005). A gradient of Gli activity mediates graded Sonic Hedgehog signaling in the neural tube. *Genes Dev.* **19**, 626-641.
- St-Jacques, B., Hammerschmidt, M. and McMahon, A. P.** (1999). Indian hedgehog signaling regulates proliferation and differentiation of chondrocytes and is essential for bone formation. *Genes Dev.* **13**, 2072-2086.
- Stone, D. M., Hynes, M., Armanini, M., Swanson, T. A., Gu, Q., Johnson, R. L., Scott, M. P., Pennica, D., Goddard, A., Phillips, H. et al.** (1996). The tumour-suppressor gene *patched* encodes a candidate receptor for Sonic hedgehog. *Nature* **384**, 129-134.
- Strigini, M. and Cohen, S. M.** (1997). A Hedgehog activity gradient contributes to AP axial patterning of the *Drosophila* wing. *Development* **124**, 4697-4705.
- Sun, Z., Amsterdam, A., Pazour, G. J., Cole, D. G., Miller, M. S. and Hopkins, N.** (2004). A genetic screen in zebrafish identifies cilia genes as a principal cause of cystic kidney. *Development* **131**, 4085-4093.
- Tabata, T., Eaton, S. and Kornberg, T. B.** (1992). The *Drosophila* hedgehog gene is expressed specifically in posterior compartment cells and is a target of engrailed regulation. *Genes Dev.* **6**, 2635-2645.
- Taipale, J., Chen, J. K., Cooper, M. K., Wang, B., Mann, R. K., Milenkovic, L., Scott, M. P. and Beachy, P. A.** (2000). Effects of oncogenic mutations in Smoothened and Patched can be reversed by cyclopamine. *Nature* **406**, 1005-1009.
- Taipale, J., Cooper, M. K., Maiti, T. and Beachy, P. A.** (2002). Patched acts catalytically to suppress the activity of Smoothened. *Nature* **418**, 892-897.
- Tashiro, S., Michiue, T., Higashijima, S., Zenno, S., Ishimaru, S., Takahashi, F., Orihara, M., Kojima, T. and Saigo, K.** (1993). Structure and expression of hedgehog, a *Drosophila* segment-polarity gene required for cell-cell communication. *Gene* **124**, 183-189.
- Tay, S. Y., Ingham, P. W. and Roy, S.** (2005). A homologue of the *Drosophila* kinesin-like protein Costal2 regulates Hedgehog signal transduction in the vertebrate embryo. *Development* **132**, 625-634.
- Taylor, M. D., Liu, L., Raffel, C., Hui, C. C., Mainprize, T. G., Zhang, X., Agate, R., Chiappa, S., Gao, L., Lowrance, A. et al.** (2002). Mutations in SUFU predispose to medulloblastoma. *Nat. Genet.* **31**, 306-310.
- Therond, P. P., Limbourg Bouchon, B., Gallet, A., Dussilol, F., Pietri, T., van den Heuvel, M. and Tricoire, H.** (1999). Differential requirements of the fused kinase for hedgehog signalling in the *Drosophila* embryo. *Development* **126**, 4039-4051.
- Tsujiyama, M. and Malicki, J.** (2004). Intraflagellar transport genes are essential for differentiation and survival of vertebrate sensory neurons. *Neuron* **42**, 703-716.
- van den Heuvel, M. and Ingham, P. W.** (1996). smoothened encodes a receptor-like serpentine protein required for hedgehog signalling. *Nature* **382**, 547-551.
- Varga, Z. M., Amores, A., Lewis, K. E., Yan, Y. L., Postlethwait, J. H., Eisen, J.**

- S. and Westerfield, M.** (2001). Zebrafish smoothed functions in ventral neural tube specification and axon tract formation. *Development* **128**, 3497-3509.
- Wang, B., Fallon, J. F. and Beachy, P. A.** (2000). Hedgehog-regulated processing of Gli3 produces an anterior/posterior repressor gradient in the developing vertebrate limb. *Cell* **100**, 423-434.
- Wang, G., Wang, B. and Jiang, J.** (1999). Protein kinase A antagonizes Hedgehog signaling by regulating both the activator and repressor forms of Cubitus interruptus. *Genes Dev.* **13**, 2828-2837.
- Wang, G., Amanai, K., Wang, B. and Jiang, J.** (2000). Interactions with Costal2 and suppressor of fused regulate nuclear translocation and activity of cubitus interruptus. *Genes Dev.* **14**, 2893-2905.
- Wang, Q. T. and Holmgren, R. A.** (2000). Nuclear import of cubitus interruptus is regulated by hedgehog via a mechanism distinct from Ci stabilization and Ci activation. *Development* **127**, 3131-3139.
- Wijgerde, M., McMahon, J. A., Rule, M. and McMahon, A. P.** (2002). A direct requirement for Hedgehog signaling for normal specification of all ventral progenitor domains in the presumptive mammalian spinal cord. *Genes Dev.* **16**, 2849-2864.
- Wilbanks, A. M., Fralish, G. B., Kirby, M. L., Barak, L. S., Li, Y. X. and Caron, M. G.** (2004). Beta-arrestin 2 regulates zebrafish development through the hedgehog signaling pathway. *Science* **306**, 2264-2267.
- Wolff, C., Roy, S. and Ingham, P. W.** (2003). Multiple muscle cell identities induced by distinct levels and timing of hedgehog activity in the zebrafish embryo. *Curr. Biol.* **13**, 1169-1181.
- Wolff, C., Roy, S., Lewis, K. E., Schauerte, H., Joerg-Rauch, G., Kirn, A., Weiler, C., Geisler, R., Haffter, P. and Ingham, P. W.** (2004). iguana encodes a novel zinc-finger protein with coiled-coil domains essential for Hedgehog signal transduction in the zebrafish embryo. *Genes Dev.* **18**, 1565-1576.
- Zhang, C., Williams, E. H., Guo, Y., Lum, L. and Beachy, P. A.** (2004). Extensive phosphorylation of Smoothened in Hedgehog pathway activation. *Proc. Natl. Acad. Sci. USA* **101**, 17900-17907.
- Zhang, X. M., Ramalho-Santos, M. and McMahon, A. P.** (2001). *Smoothened* mutants reveal redundant roles for Shh and Ihh signaling including regulation of L/R symmetry by the mouse node. *Cell* **106**, 781-792.
- Zhu, A. J., Zheng, L., Suyama, K. and Scott, M. P.** (2003). Altered localization of *Drosophila* Smoothened protein activates Hedgehog signal transduction. *Genes Dev.* **17**, 1240-1252.
